# Supplementary material for: Deregulation of tumor suppressive ASXL1−PTEN/AKT axis in myeloid malignancies
Source: PubMed Central journal article supplement — J Mol Cell Biol. 2020 Apr 1;12(9):688–99. doi: 10.1093/jmcb/mjaa011 (PMC7749738; doi:10.1093/jmcb/mjaa011), 2020-04-01
Supplement: mjaa011_supplementary_material.pdf [file mjaa011_supplementary_material.pdf]

## Supplementary material

### **Deregulation of tumor suppressive ASXL1–PTEN/AKT axis in myeloid malignancies**

Lei Cao<sup>1</sup>, Xianyou Xia<sup>1</sup>, Yu Kong<sup>1</sup>, Fengqin Jia<sup>2</sup>, Bo Yuan<sup>2</sup>, Rui Li<sup>1</sup>, Qian Li<sup>1</sup>, Yuxin Wang<sup>1</sup>, Mingrui Cui<sup>1</sup>, Zhongye Dai<sup>1</sup>, Huimin Zheng<sup>3</sup>, Jesper Christensen<sup>4</sup>, Yuan Zhou<sup>5</sup>, and Xudong Wu<sup>1,5,\*</sup>

<sup>1</sup> Collaborative Innovation Center of Tianjin for Medical Epigenetics, Tianjin Key Laboratory of Medical Epigenetics, Key Laboratory of Immune Microenvironment and Disease (Ministry of Education), Department of Cell Biology, Tianjin Medical University, Tianjin 300070, China

<sup>2</sup> National Demonstration Center for Experimental Basic Medical Science Education, Tianjin Medical University, Tianjin 300070, China

<sup>3</sup> Department of Prosthodontics, School and Hospital of Stomatology, Tianjin Medical University, Tianjin 300070, China

<sup>4</sup> Biotech Research and Innovation Centre and Centre for Epigenetics, University of Copenhagen, Ole Maaløes Vej 5, 2200 Copenhagen, Denmark

<sup>5</sup> State Key Laboratory of Experimental Hematology, Institute of Hematology and Blood Diseases Hospital, Chinese Academy of Medical Sciences and Peking Union Medical College, Tianjin 300020, China

\* Correspondence to: Xudong Wu, Tel: +86 8333 6825; Fax: +86 8333 6519; E-mail: [wuxudong@tmu.edu.cn](mailto:wuxudong@tmu.edu.cn)

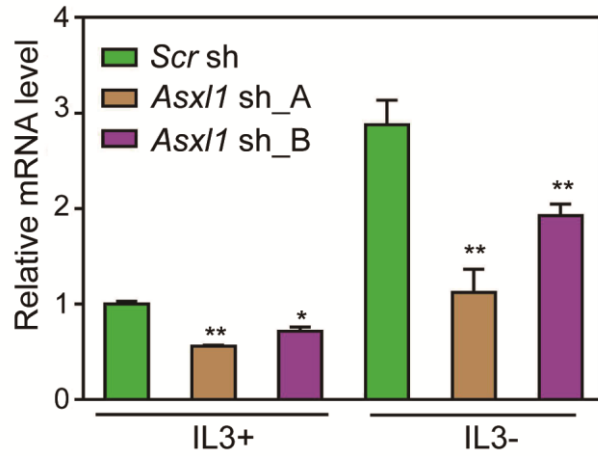

**Supplementary Figure 1** Efficient knockdown of Asx11 in 32D cells. RT-qPCR analysis of Asx11 expression levels in control (*Scr sh*) and Asx11-KD 32D cells (*Asx11 sh\_A* and *Asx11 sh\_B*) in the presence or absence of IL3. The error bars denote SD, n = 3.

A

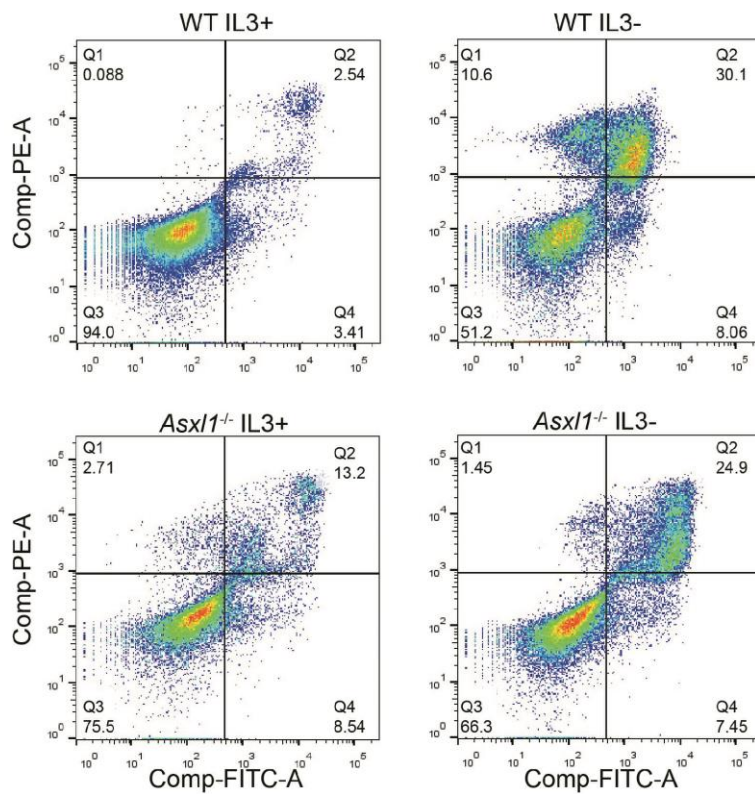

B

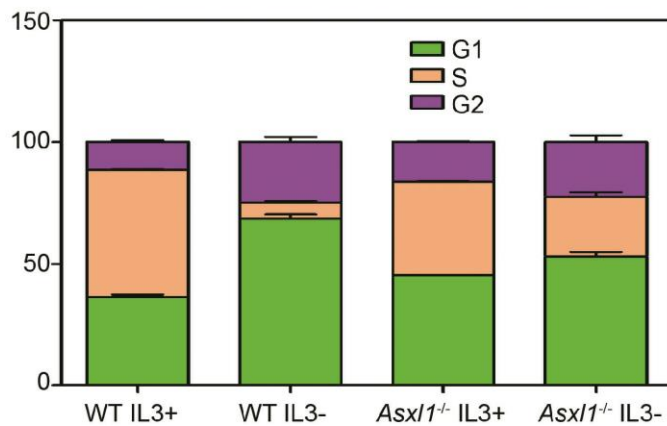

**Supplementary Figure 2** Effects of *Asx11* loss on cell apoptosis and cell cycle. 32D cells were cultured with or without IL3 for 24 h. Cell apoptosis (A) and cell cycle (B) were tested by flow cytometry. The cell cycle distributions of four cell lines are presented as percentages. WT IL3+: G1 (36.47), S (52.02), G2 (11.52); WT IL3-: G1 (68.63), S (6.48), G2 (24.90); *Asx11*<sup>-/-</sup> IL3+: G1 (45.31), S (38.56), G2 (16.13); *Asx11*<sup>-/-</sup> IL3-: G1 (53.10), S (24.43), G2 (22.47).

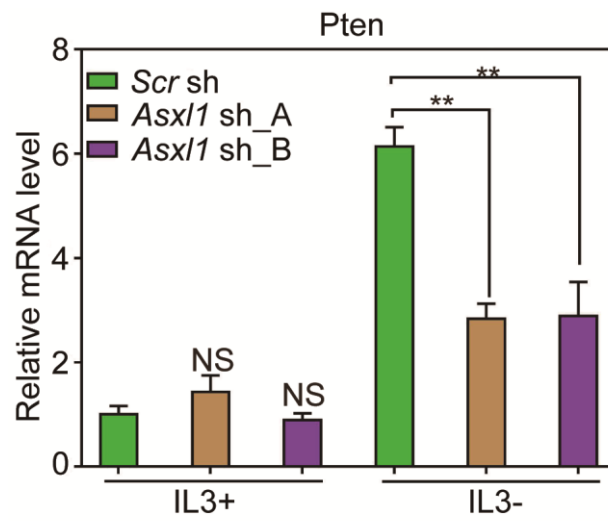

**Supplementary Figure 3** *Pten* fails to be activated with depletion of *Asx11*. RT-qPCR analysis to determine the *Pten* expression levels in control (*Scr sh*) and *Asx11*-KD 32D cells (*Asx11 sh\_A* and *Asx11 sh\_B*). The error bars denote SD, n = 3.

**A**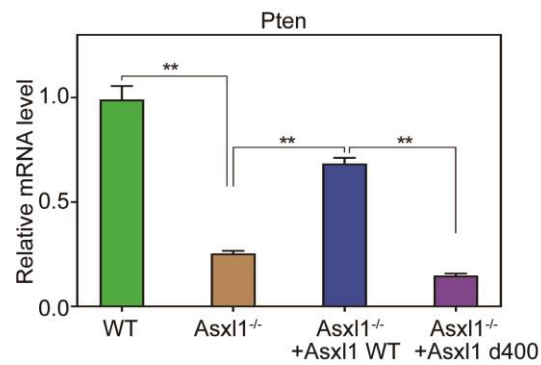**B**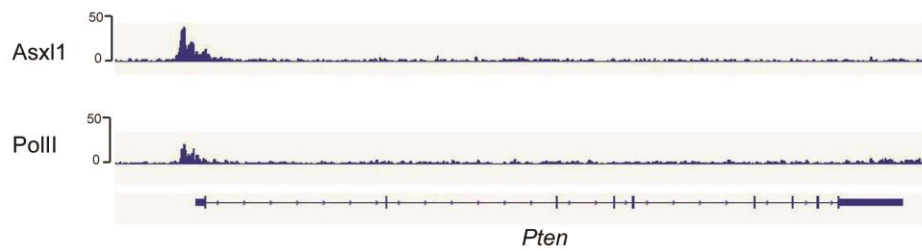

**Supplementary Figure 4** *Asx1* regulates *Pten* activation through binding to its promoter. (A) WT and *Asx1* d400 (deletion of 1-400 aa at the N-terminus) were overexpressed in *Asx1* KO 32D cells. RT-qPCR analysis to determine the *Pten* expression levels by withdrawal of IL3 for 24 h. (B) *Asx1* binds to the *Pten* promoter. Genomic snapshots of ASXL1 (Top) and RNA pol II (bottom) ChIP-seq analyses in haematopoietic stem cells (GSE99103) at the *Pten* locus.

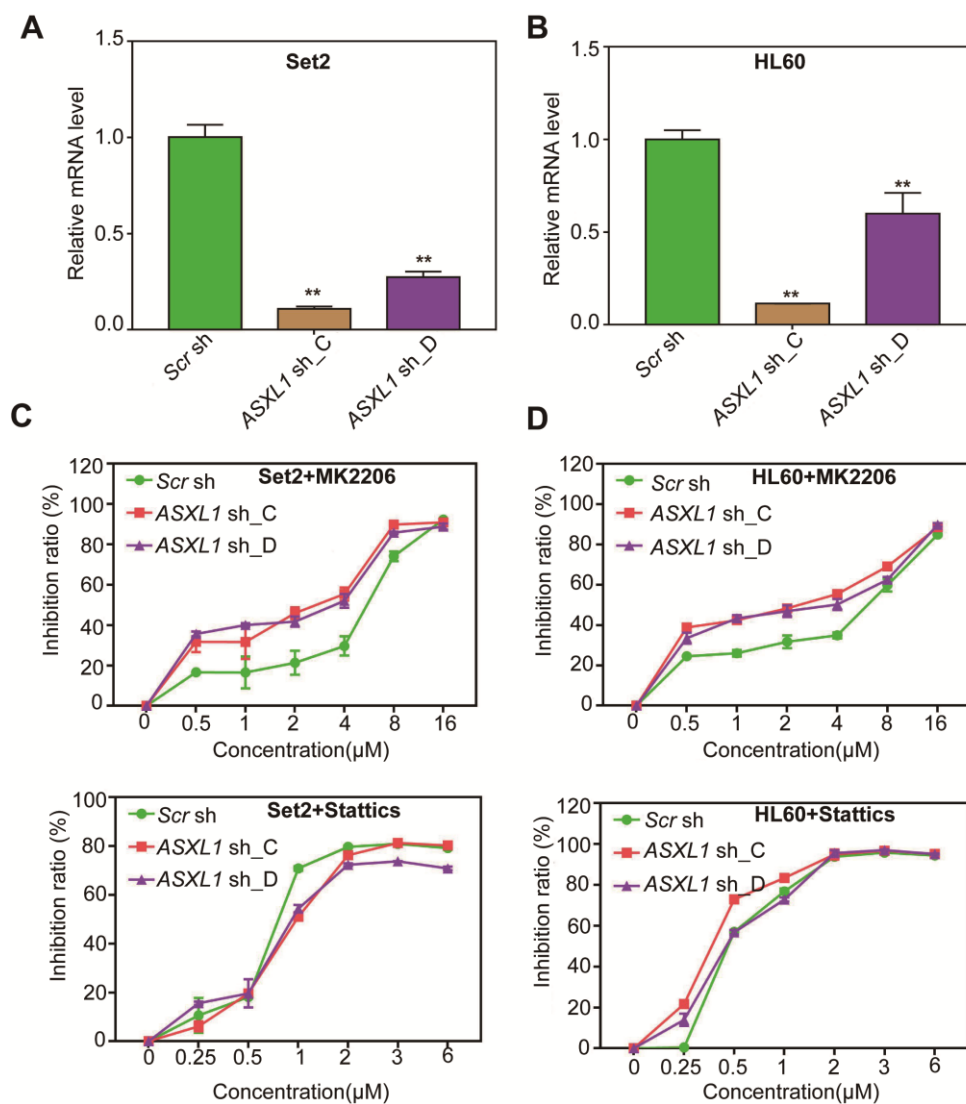

**Supplementary Figure 5** ASXL1 knockdown confers cells AKT sensitivity. (**A** and **B**) Efficient knockdown of ASXL1 in Set2 cells (**A**) and HL60 cells (**B**). (**C** and **D**) The inhibition ratio of each concentration in Set2 cells (**C**) and HL60 cells (**D**) using MK2206 and Stattic. Data are presented as sigmoid curves.

**Supplementary Table S1 Specific oligonucleotides for shRNA and sgRNA cloning.**

| <b>Name</b> | <b>Sequence (5'-3')</b> |
|-------------|-------------------------|
| Asx11 sgRNA | GAGGACTCCGCTGATGTGGA    |
| Asx11 sh_A  | GTGGAAAGCTGTGGGTCTA     |
| Asx11 sh_B  | GCTGATGGTGAATTCATCAT    |
| ASXL1 sh_C  | GCTTCTGTAAGTATGCTCTAT   |
| ASXL1 sh_D  | CCAGGAGAATCAGTGCGTATA   |

**Supplementary Table S2 Primers used in this study.**

| <b>Primer name</b> | <b>Sequence (5'-3')</b>                                                     | <b>Notes</b>                                       |
|--------------------|-----------------------------------------------------------------------------|----------------------------------------------------|
| Asxl-qRT-F         | GAAATGCAGCTACAGTGGATG                                                       | Forward primer for RT-qPCR of mouse <i>Asxl1</i>   |
| Asxl-qRT-R         | TGTCCTGGGATTGGAGAG                                                          | Reverse primer for RT-qPCR of mouse <i>Asxl1</i>   |
| Bap1-qRT-F         | CCACAAATCTCAAGAGTCACAGC                                                     | Forward primer for RT-qPCR of mouse <i>Bap1</i>    |
| Bap1-qRT-R         | CTTCACCACCAGCTTACATTTG                                                      | Reverse primer for RT-qPCR of mouse <i>Bap1</i>    |
| Pten-qRT-F         | GAAAGGGACGGACTGGTGTA                                                        | Forward primer for RT-qPCR of mouse <i>Pten</i>    |
| Pten-qRT-R         | AGTGCCACGGGTCTGTAATC                                                        | Reverse primer for RT-qPCR of mouse <i>Pten</i>    |
| ASXLI-qRT-F        | GATGTGGAGAGCTGTGGGTCTAATG                                                   | Forward primer for RT-qPCR of human <i>ASXLI</i>   |
| ASXLI-qRT-R        | TTACCTTCAGAGGAGTCAGGACAAC                                                   | Reverse primer for RT-qPCR of human <i>ASXLI</i>   |
| PTEN-qRT-F         | TGGATTCGACTTAGACTTGACCT                                                     | Forward primer for RT-qPCR of human <i>PTEN</i>    |
| PTEN-qRT-R         | GGTGGGTTATGGTCTTCAAAGG                                                      | Reverse primer for RT-qPCR of human <i>PTEN</i>    |
| MYC-PtenEcoRI-F    | GGAATTCATGGAGCAAAAGCTCATTCTG<br>AAGAGGACTTGAATGAAACAGCCATCATC<br>AAAGAGATCG | Forward primer for cloning human <i>PTEN</i>       |
| PTEN-BamHI-R       | CGGGATCCTTAGACTTTTGTAATTTGTGAA<br>TGCTG                                     | Reverse primer for cloning human <i>PTEN</i>       |
| PTEN C124S-F       | CATGTTGCAGCAATTCACAGTAAAGCTGG                                               | Forward primer for cloning human <i>PTEN C124S</i> |
| PTEN C124S-R       | TGTGAATTGCTGCAACATGATTGTCATCTT<br>C                                         | Reverse primer for cloning human <i>PTEN C124S</i> |
| Pten TSS-F         | GATGTGGCGGGACTCTTTGT                                                        | Forward primer for ChIP-qPCR of mouse <i>Pten</i>  |
| Pten TSS-R         | ACAGCGGCTCAACTCTCAA                                                         | Reverse primer for ChIP-qPCR of mouse <i>Pten</i>  |



**Supplementary Table S3 Clinical information of the MDS/CMML patients.**

| Patient samples | Diagnosis*                                              | Sex       | Age (yrs) | chromosome karyotype  | ASXL1 genotyping               |
|-----------------|---------------------------------------------------------|-----------|-----------|-----------------------|--------------------------------|
| 1               | MDS (RCMD)                                              | M         | 48        | ND                    | WT                             |
| 5               | CMML                                                    | M         | 54        | 46,xy[11]             | c.1934dupG                     |
| 9               | MDS (RAEB1)                                             | M         | 69        | 46,xy[13]             | WT                             |
| 10              | CMML                                                    | F         | 34        | 46,xx[3]              | WT                             |
| 11              | CMML                                                    | M         | 37        | 46,xy,del(7)(p12)[11] | c.1934dupG                     |
| 12              | MDS (RCMD)                                              | F         | 49        | ND                    | c.1934dupG                     |
| M30             | PMF                                                     | M         | 33        | ND                    | WT                             |
| M60             | PMF                                                     | F         | 67        | ND                    | WT                             |
| M251            | CMML                                                    | M         | 78        | 47, XY,+8[9]/46,XY[2] | c.1934dupG<br>p.Gly646TrpfsX12 |
| M252            | PMF                                                     | M         | 59        | 46,XY[7]              | c.2468 delT, p.Leu823X         |
| M319            | MDS                                                     | M         | 42        | 46,XY[2]              | c.1772dupA p.Thr591X           |
| M689            | MDS                                                     | M         | 68        | 46,XY[20]             | WT                             |
|                 | *According to the WHO classification                    | M: male   |           | ND: non-determined    | WT: wild type                  |
|                 | RAEB1: Refractory anemia with excess blasts, type 1     | F: female |           |                       | Mut: mutations                 |
|                 | RCMD: Refractory cytopenias with multilineage dysplasia |           |           |                       |                                |
